# 1 Value-driven attentional capture enhances distractor representations 2 in early visual cortex

3  
4 Running title: Neural signature of value-driven attentional capture in early visual cortex

5  
6 Sirawaj Itthipuripat<sup>1, 2, 3\*</sup>, Vy A. Vo<sup>3\*</sup>, Thomas C. Sprague<sup>3,4,5</sup>, John T. Serences<sup>3,6</sup>

7  
8 <sup>1</sup>Department of Psychology and Center for Integrative and Cognitive Neuroscience, Vanderbilt  
9 University, Nashville, Tennessee, 37235, USA

10 <sup>2</sup>Learning Institute and Futuristic Research in Enigmatic Aesthetics Knowledge Laboratory, King  
11 Mongkut's University of Technology Thonburi, Bangkok, 10140, Thailand

12 <sup>3</sup>Neurosciences Graduate Program, University of California, San Diego, La Jolla, California  
13 92093-0109 USA

14 <sup>4</sup>Department of Psychology, New York University, New York, New York, 10003, USA

15 <sup>5</sup>Department of Psychological and Brain Sciences, University of California, Santa Barbara,  
16 Santa Barbara, California 93106-9660, USA

17 <sup>6</sup>Department of Psychology and Kavli Foundation for the Brain and Mind, University of  
18 California, San Diego, La Jolla, California 92093-0109 USA

19  
20 \*These authors contributed equally

21  
22 RUNNING TITLE: Neural basis of value-based attention

## 23 24 Correspondence

25 [itthipuripat.sirawaj@gmail.com](mailto:itthipuripat.sirawaj@gmail.com) (S.I.)

26 Department of Psychology and Center for Integrative and Cognitive Neuroscience  
27 Vanderbilt University  
28 301 Wilson Hall, 111 21st Ave South  
29 Nashville, TN 37203

30  
31 or

32  
33 [jserences@ucsd.edu](mailto:jserences@ucsd.edu) (J.T.S.)

34 Department of Psychology and Neurosciences Graduate Program  
35 University of California, San Diego  
36 9500 Gilman Drive, La Jolla, CA, 92093

## 37 38 39 Author Contributions

40 SI conceived and implemented the experiments, collected and analyzed the data, wrote the first draft of  
41 the manuscript, and edited the manuscript. VAV collected and analyzed the data and co-wrote the  
42 manuscript. TCS conceived the experiments and co-wrote the manuscript. JTS conceived the  
43 experiments, supervised the project, and co-wrote the manuscript.

53 **ABSTRACT (209 words)**

54 When a behaviorally relevant stimulus has been previously associated with reward,  
55 behavioral responses are faster and more accurate compared to equally relevant but  
56 less valuable stimuli. Conversely, task irrelevant stimuli that were previously associated  
57 with a high reward can capture attention and distract processing away from relevant  
58 stimuli (e.g. the chocolate bar in the pantry when you are looking for a nice healthy  
59 apple). While increasing the value of task-relevant stimuli systematically up-regulates  
60 neural responses in early visual cortex to facilitate information processing, it is not clear  
61 if the value of task-irrelevant distractors influences behavior via competition in early  
62 visual cortex or via competition at later stages of decision-making and response  
63 selection. Here, we measured fMRI in human visual cortex while subjects performed a  
64 value-based learning task, and applied a multivariate inverted encoding model to  
65 assess the fidelity of distractor representations in early visual cortex. We found that the  
66 fidelity of neural representations related to task-irrelevant distractors increased when  
67 the distractors were previously associated with a high reward. Moreover, this value-  
68 based modulation of distractor representations only occurred when the distractors were  
69 previously selected as targets on preceding trials. Together, these findings suggest that  
70 value-driven attentional capture begins with sensory modulations of distractor  
71 representations in early areas of visual cortex.

72  
73  
74  
75  
76  
77  
78  
79  
80  
81  
82  
83  
84  
85  
86  
87  
88  
89  
90  
91  
92  
93  
94  
95  
96  
97  
98

## 99 Introduction

100 In most real-world situations, stimuli that are visually salient—such as a camera flash in  
101 a theater, or a green object in a sea of red—automatically capture attention[1–4].  
102 Likewise, distractors that are distinguished only by their value, not their visual salience,  
103 also capture visual attention—even on occasions when high-value distractors are  
104 completely irrelevant and unactionable (e.g., a driver runs a red light because they get  
105 distracted by luxury sports car)[5–10]. In the laboratory, the value associated with an  
106 irrelevant distractor interferes with the processing of task-relevant visual information,  
107 resulting in increased response times (RTs) and sometimes reduced accuracy in a  
108 variety of tasks ranging from simple visual discrimination to more complex scenarios in  
109 which the value of multiple competing items must be compared[5–8,10–17]. Importantly,  
110 these behavioral effects of value-based attentional capture are overexpressed in  
111 patients with attention-deficit hyperactivity disorder and addiction[18,19]. While previous  
112 work has shown that the value of task-relevant visual information increases neural  
113 activity in areas of early visual cortex [20–26], it is unclear how the learned value of  
114 irrelevant distractors modulates cortical responses in these regions.

115  
116 To examine this, we recruited human participants to perform a value-based decision-  
117 making task and measured their brain activity in visual cortex using functional magnetic  
118 resonance imaging (fMRI). Subjects were required to select one of two task-relevant  
119 options while ignoring a third irrelevant and unactionable distractor that was rendered in  
120 a color that had been previously associated with a variable level of reward. We  
121 hypothesized that the previously assigned value of the distractor color would modulate  
122 evoked responses in early visual cortex, and that this reward-based modulation would  
123 be specific to the spatial location of the distractor stimulus. To evaluate spatially  
124 selective modulations, we used an inverted encoding model (IEM) to reconstruct a  
125 representation of each stimulus using activation patterns of hemodynamic responses  
126 from retinotopically organized visual areas V1, V2, and V3. We found that distractors  
127 previously associated with a high value slowed choice RTs. Distractors were also  
128 represented with higher fidelity in extrastriate visual areas V2 and V3. Importantly, these  
129 value-based modulations of behavior and of neural representations depended on target  
130 selection history. That is, the effect of distractor value on behavioral and neural data  
131 only occurred when the color of the distractor matched the color of a recently selected  
132 target. Together, these results suggest that the influence of high-value distractors on  
133 attentional capture begins with an early modulation of sensory responses, and that this  
134 value-driven attentional capture occurs when participants have learned the value  
135 associated with the visual feature of the distractor.

## 136 137 Results

### 138 High-valued distractors automatically capture attention

139 In the present study, we used fMRI to measure activity in retinotopically organized  
140 visual areas V1, V2, and V3 while human participants ( $N=15$ ) performed a two-  
141 alternative value-based decision-making task with changing reward associations [6]  
142 (Figure 1). On each trial, three stimuli were presented, each rendered in a different  
143 color. Two of the stimuli were presented in fixed target locations and subjects had to  
144 choose between them. The third stimulus, termed a 'distractor', was presented in

145 another fixed location that subjects could never select. Participants learned that different  
146 rewards (1 or 9 cents) were associated with the colors of visual stimuli presented at the  
147 two target locations. Importantly, the distractor was not actionable and was thus  
148 completely irrelevant with respect to evaluating the relative value of the two possible  
149 targets. Across trials, the colors of the targets and the distractor changed randomly so  
150 that the distractor color on a given trial could match the color of a previously selected  
151 target that yielded either a low or a high monetary reward. Additionally, the pairings  
152 between color and reward changed across mini-blocks of 8 trials, so that values  
153 assigned to different colors could be counterbalanced. Thus, for behavioral and fMRI  
154 analyses, we sorted trials based on incentive values assigned to the colors of  
155 distractors (i.e., low- or high-valued distractor). The incentive value was always defined.  
156 However, a given color may not have been selected on previous trials. Therefore, the  
157 current value of the distractor was not always known to the participant. We thus  
158 examined the ‘selection history’ of the current distractor color by coding whether it was  
159 selected as a target in the previous 3 trials (i.e., selected or unselected; see Materials  
160 and Methods).

161  
162 Overall, subjects selected higher valued targets more often than lower valued targets  
163 (Figure 2A,  $p \leq 1 \times 10^{-6}$ , 2-tailed, resampling test). This indicates that subjects were able  
164 to learn the values assigned to the different colors. Next, we fit the choice preference  
165 data as a function of differential target value with a cumulative Gaussian function  
166 (Figure 2B). We found no effect of distractor value (high – low distractor value) on these  
167 fit parameters on trials where the current distractors were previously selected ( $p$ 's =  
168 0.9420 and 0.0784 for *sigma* and *mu*, respectively, 2-tailed) or unselected (Figure 2B;  
169  $p$ 's = 0.5637 and 0.8206 for *sigma* and *mu*, respectively, 2-tailed). The null distractor  
170 value effect in the choice preference data is consistent with a large body of literature  
171 demonstrating smaller and more variable distractor value effects on task accuracy  
172 [11,27,28].

173  
174 While there was no distractor value modulation on the choice preference data, RTs  
175 differed significantly across different distractor types (Table 1). We observed a  
176 significant effect of distractor value (high – low distractor value) on RTs on trials where  
177 the current distractor was previously selected (Figure 2D;  $p \leq 1 \times 10^{-6}$ , 2-tailed). However,  
178 there was no distractor value modulation on trials where the current distractors were  
179 previously unselected ( $p = 0.2756$ , 2-tailed). Moreover, the magnitude of the distractor  
180 value modulation was significantly higher for the current distractor that was previously  
181 selected vs. unselected ( $p = 0.0102$ , 1-tailed). These RT results show that the distractor  
182 value captures attention, leading to a relative increase in the speed with which subjects  
183 processed task-relevant targets [5–8,13–17].

184  
185 The reward history of distractors modulates neural representations in early visual cortex

186  
187 To examine the influence of the distractor value on spatially specific distractor- and  
188 target-related neural representations in early visual cortex, we employed a multivariate  
189 analysis of fMRI data – an inverted encoding model (IEM; Materials and Methods;  
190 Figure 3) [20,29–31]. The IEM exploits the spatial tuning of neuronal populations in

191 visual cortex to reconstruct representations of target and distractor stimuli based on  
192 population-level activity measured via fMRI. As expected, we found that these  
193 reconstructions peaked at the center of each of the three locations (Figure 4A; sorted as  
194 unselected target, selected target, and distractor). Qualitatively, the reconstructed  
195 activation at the distractor location was highest when the distractor colors matched the  
196 target colors that had been selected (i.e., selected distractors) and rewarded with a  
197 higher value in the previous trials (i.e., the high-valued & previously selected distractor,  
198 the top right of the Figure 4A), compared to all the other distractor conditions.

199  
200 To quantify this effect, we computed the mean activation level in the reconstructed  
201 stimulus representations over the space occupied by the distractors (Figure 4A, see  
202 Materials and Methods; also see Sprague et al., 2018). Then, we used a non-parametric  
203 resampling method (i.e., resampling subjects with replacement) to evaluate the impact  
204 of distractor value (high vs. low distractor values) on the mean activation of the  
205 distractor representation. We did this separately for trials where the current distractor  
206 had been previously selected or unselected in preceding trials to determine if distractor  
207 value modulations depended on the selection history associated with the color of the  
208 distractor.

209  
210 First, we analyzed the data averaged across V1-V3 (Figure 4B). We found a significant  
211 distractor value modulation (high > low value) for the distractor that was previously  
212 selected ( $p = 1 \times 10^{-3}$ , 2-tailed) but a null result for the distractor that was previously  
213 unselected ( $p = 0.4956$ , 2-tailed). We directly evaluated this effect and found that  
214 selection history significantly increased distractor value modulation ( $p = 0.0243$ , 1-  
215 tailed). We then repeated these tests separately for individual visual areas. We found  
216 significant distractor value modulations for the previously selected distractor in  
217 extrastriate visual areas V2 and V3 ( $p = 0.0011$  and  $p = 0.0052$ , passing the Holm-  
218 Bonferroni-corrected thresholds of 0.0167 and 0.025, respectively, 2-tailed) but not in  
219 the primary visual cortex V1 ( $p = 0.3318$ , 2-tailed). In V2 and V3, we confirmed that  
220 selection history had a significant effect on distractor value modulation ( $p = 0.0086$  and  
221  $p = 0.0374$ , respectively, 1-tailed). Similar to the data averaged across V1-V3, there was  
222 no significant distractor value modulation for the previously unselected distractors in any  
223 visual area ( $p = 0.2031$ ,  $p = 0.6263$ , and  $p = 0.9230$ , for V1, V2, and V3, respectively, 2-  
224 tailed). In sum, we used an IEM to evaluate spatially-specific representations of  
225 behaviorally irrelevant stimuli with an associated reward history. We found that the  
226 value associated with irrelevant visual features is encoded in spatially-specific activation  
227 in early visual areas V2 and V3.

228  
229 Target selection and target value are encoded in early visual cortex

230  
231 As shown in Figure 3A, stimulus representations are generally higher for selected  
232 targets compared to unselected targets. To quantify this effect, we computed the mean  
233 activation level in the reconstructed stimulus representations over the space occupied  
234 by the selected and unselected targets (Figure 5A). For the data collapsed across V1-  
235 V3, we observed a significant target selection modulation (selected > unselected  
236 targets:  $p = 0.0011$  for data collapsed across distractor types;  $p$ 's = 0.0642, 0.0003,

237 0.0228, and 0.0022 for low-valued & unselected, high-valued & unselected, low-valued  
238 & selected, and high-valued & selected distractors, with the Holm-Bonferroni-corrected  
239 thresholds of 0.05, 0.0125, 0.025, and 0.0167, respectively, 2-tailed). These target  
240 selection modulations were significant in all visual areas ( $p$ 's = 0.0189,  $4.600 \times 10^{-4}$  and  
241  $p = 5.600 \times 10^{-4}$ , V1, V2 and V3, respectively; Holm-Bonferroni-corrected, 2-tailed).

242  
243 Next, we evaluated the impact of distractor value on the differential activity between  
244 selected and unselected targets. We found no influence of distractor value on target  
245 representations (high- vs low-valued distractors) on trials where the current distractor  
246 was previously selected ( $p = 0.2303$ , 2-tailed) or on trials where the current distractor  
247 was unselected ( $p = 0.4463$ , 2-tailed). Similar null results were also observed when the  
248 data were analyzed separately in V1, V2, and V3 ( $p$ 's = 0.1639-0.8710 and 0.0744-  
249 0.9419 for the selected and unselected conditions, 2-tailed). These are consistent with  
250 the null distractor value effects on the choice preference data (Figures 2A-B).

251  
252 Previous studies have reported that the relative value of targets is encoded in early  
253 visual cortex [23–25]. To test this, we analyzed the target selection modulation data  
254 both when the selected and unselected targets had the same value (i.e., selected =  
255 unselected targets), and when the selected target had a higher value compared to the  
256 unselected target (i.e., selected > unselected targets). As shown in Figure 5B, we found  
257 significant target selection modulations only when the selected targets had a higher  
258 value compared to the unselected targets in all visual areas ( $p$ 's = 0.0055,  $4 \times 10^{-6}$ , and  
259  $1 \times 10^{-6}$ , passing the Holm-Bonferroni-corrected thresholds of 0.0125, 0.0100, and  
260 0.0083 for V1, V2, and V3, respectively, 2-tailed), but no significant target modulations  
261 when selected and unselected targets had the same value ( $p$ 's = 0.0437-0.0756, which  
262 did not pass the Holm-Bonferroni-corrected threshold of 0.0167, 2-tailed). In addition, on  
263 trials where participants selected the higher-valued target, the target selection effect  
264 was significantly stronger in V3 than V1 ( $p = 0.0021$ , passing the Holm-Bonferroni-  
265 corrected of 0.0167, 2-tailed). However, there was not a significant difference between  
266 V3 and V2 ( $p = 0.1165$ , 2-tailed) or between V2 and V1 ( $p = 0.1274$ , 2-tailed). Taken  
267 together with the previous section, our results show that the encoding of target value  
268 and distractor value can occur in parallel in early areas of visual cortex.

## 269 270 **Discussion**

271 Visual stimuli that are not physically salient but that are paired with high reward values  
272 are known to automatically capture attention, even when those stimuli are behaviorally  
273 irrelevant and unactionable [5–9]. While a recent study reported that neural responses  
274 associated with distractors scale with reward history [32], it is unclear if these  
275 modulations were tied specifically to the location of the distractor and whether distractor  
276 response modulations led to attenuated target responses. Using a multivariate spatial  
277 reconstruction analysis of fMRI data, we show here that retinotopically organized  
278 regions in extrastriate visual areas V2 and V3 are modulated by the reward history of  
279 irrelevant visual stimuli. Importantly, the spatial reconstructions of these stimuli indicate  
280 that reward-based modulations occur precisely at the location of the distractor and that  
281 there is little associated impact on responses to simultaneously presented targets.

282 Taken together, our results suggest that value-based modulations may begin with the  
283 early value-based modulation of sensory responses evoked by the distractor.

284  
285 At the first glance, our results seem to contradict several recent studies that observed a  
286 reward-based suppression of neural representations associated with distractors in  
287 sensory cortices [33–36]. However, in many of these studies, the reward manipulation  
288 was not specifically tied to the distractor and distractor suppression was inferred based  
289 on modulations of neural responses related to the task-relevant targets [33–35]. Thus,  
290 these recent results are actually in line with the current data, in which the reconstruction  
291 activation of selected targets was higher than unselected targets and low-valued  
292 distractors. That said, another recent study reported that a high-valued distractor  
293 induced weaker neural representations in early visual cortex compared to the low-  
294 valued distractor [36]. However, they found that this was true only when the distractor  
295 was physically more salient than the target in a perceptually demanding task[36]. They  
296 reasoned that the high sensory competition between low salience targets and high  
297 salience distractors required top-down attentional suppression of the high-valued  
298 targets[36]. However, this was not the case in the current experiment, where all stimuli  
299 were suprathreshold and matched for luminance. Thus, in the context of our  
300 experimental design, we did not find evidence for distractor suppression at either the  
301 behavioral or neural level.

302  
303 In the present study, we showed that an association between reward and color can  
304 induce neural modulations in early visual areas V1 – V3. This is somewhat surprising  
305 given evidence that neurons in higher visual areas, such as V4, V8, VO1, and inferior  
306 temporal cortex, are selectively tuned to chromatic information and responsible for  
307 processing color-based top-down modulations [29,37–42]. We suggest that value-based  
308 modulations in early visual areas may reflect top-down feedback signals from these  
309 higher visual areas, where the association between color and reward might be  
310 computed. Related to this idea, we found significant distractor value modulations only in  
311 extrastriate visual cortex but not in V1, which may reflect a reentrant signal  
312 backpropagated to earlier visual areas. The more robust effects in higher visual areas  
313 were also observed for the task-relevant target reconstructions, consistent with previous  
314 reports [20,30,31,43,44]. Overall, this pattern of data supports theoretical frameworks  
315 suggesting that visual cortex operates as a priority map which indexes the rank-ordered  
316 importance of different sensory inputs [20,23–25,30,31,33,34,45,46]. That said, the  
317 assumption that the color-reward association can only be computed in higher visual  
318 areas has to be considered with caution, because studies have also found that primary  
319 and extrastriate visual areas contain neuronal populations with an inhomogeneous  
320 spatial distribution of color selectivity [47,48].

321  
322 In summary, we demonstrate that the learned value of irrelevant distractors  
323 automatically captures attention and that this interferes with the processing of relevant  
324 visual information. This value-based attentional capture results in increased RTs and  
325 heightened distractor representations in retinotopically organized areas of extrastriate  
326 visual cortex. Together, our findings suggest that value-driven attentional capture  
327 begins with early sensory modulations of distractor representations in visual cortex.

328 Moreover, the modulations of both relevant targets and irrelevant distractors supports a  
329 recent re-framing of the classic dichotomy between bottom-up and top-down biasing  
330 factors in favor of a trichotomy that emphasizes a crucial role of learned reward history  
331 on the processing of relevant and irrelevant visual information [9].  
332

333

## 334 **Materials and methods**

### 335 *Participants*

336 Sixteen neurologically healthy human observers with normal color vision and normal or  
337 corrected-to-normal acuity participated in the present study. Participants were recruited  
338 from the University of California, San Diego (UCSD) community and all participants  
339 provided written informed consent as required by the local Institutional Review Board at  
340 UCSD (IRB# 081318). They then completed one scanning session of the main  
341 experiment and one or two sessions of retinotopic mapping scans. Participants were  
342 compensated 20 dollars per hour in the scanner with additional monetary rewards that  
343 scaled with their behavioral performance in the value-based learning task (mean 13.13  
344 dollars, SD 0.74). Data from one subject were excluded because of excessive  
345 movement artifacts during the retinotopy scans (>3 mm movement in more than half of  
346 the scans), leaving a total of 15 participants in the final analysis (age range 20 - 34  
347 years old, mean age = 24.6,  $\pm 4.29$  SD).  
348

349

### 349 *Stimuli and tasks*

350 Visual stimuli were rear-projected onto on a 115 cm-wide flat screen placed ~440 cm  
351 from the participant's eyes at the foot of the scanner bore using a LCD projector  
352 (1024x768, 60 Hz, with a grey background, luminance = 8.68 cd/m<sup>2</sup>). The behavioral  
353 paradigms were programmed and presented via a laptop running Windows XP using  
354 MATLAB (Mathworks Inc., Natick, MA) and the Psychophysics Toolbox [49,50].  
355

356

### 356 Value-based decision-making task

357 We adopted a value-based decision-making task that we recently used to show a robust  
358 effect of distractor reward history on behavior [6]. Each block started with an instruction  
359 period, telling participants the locations of the two targets and the location of the  
360 irrelevant distractor. The position of each stimulus was indicated by different letter  
361 strings located inside three circular placeholders equally spaced from one another (120°  
362 polar angle apart with an eccentricity of 3.02° visual angle; Figure 1). The placeholders  
363 remained visible for the entire run so that participants knew the precise target and  
364 distractor locations. The instruction period was followed by experimental trials where  
365 three physically isoluminant checkerboard stimuli of different colors were presented  
366 (black paired with red, green, and blue, radius of 1.01° visual angle, and spatial  
367 frequency of 1.98 cycles per degree visual angle). The stimuli were flickered on-off at  
368 7.5 Hz for 1 sec.  
369

370

370 Participants were instructed to choose one of the two targets to maximize their reward,  
371 and were told that the reward value associated with each color changed across the  
372 course of the scan. The reward values associated with each stimulus color were



373 changed every 8 trials (a mini-block). Subjects were not explicitly informed about the  
374 length of this mini-block but they were told that reward-color associations would change  
375 dynamically across a small chunk of trials. All 8 possible combinations of the three  
376 colors and two reward values (1 and 9 cents) were presented in each mini-block. The  
377 color assignments to each target and distractor stimulus were also counterbalanced  
378 within each mini-block. Trial order was pseudo-randomized so that the colors of the  
379 visual stimuli at three stimulus locations swapped in an unpredictable fashion. The  
380 assignment of different values to each color was also randomized so that changes in  
381 color-reward associations were unpredictable.

382  
383 Participants were instructed to choose one of the two targets using two fingers on the  
384 right hand, as indicated in a diagram displayed before the run started (Figure 1).  
385 Importantly, the distractor could never be chosen and was thus choice-irrelevant. After a  
386 1.25 sec delay following the offset of the stimulus array, participants received visual  
387 feedback indicating the value associated with the chosen target color ('1' or '9';  
388 feedback duration = 0.25 sec). If a response was not given before the stimulus offset,  
389 they would receive a letter 'M' ("miss") to indicate that no reward was earned on that  
390 trial. On a random 20% of trials, rewards were withheld to encourage participants to  
391 explore and learn the value of each color (done independently for each of the two  
392 targets). '0' cents were given in these trials indicating that participants received no  
393 reward. The feedback period was followed by a blank inter-trial interval with a central  
394 fixation for 1.5 sec.

395  
396 Participants completed 6 total blocks with the distractor location remaining stable for 2  
397 consecutive blocks to ensure that participants knew the exact position of the distractor  
398 stimulus. Across all blocks the distractor location was counterbalanced across the 3  
399 possible stimulus positions. Each block lasted 4 min 57 sec and contained 48  
400 experimental trials and 20 pseudorandomly interleaved null trials. There was a blank  
401 period of 9 sec at the end of each block. We counterbalanced stimulus configurations  
402 across participants to ensure our results were not influenced by any spatial bias. To  
403 sample data from the entire circular space across subjects, the stimulus arrays were  
404 rotated by 30° polar angle to form four configurations (15°-135°-255°, 45°-165°-285°,  
405 and 75°-195°-315°, and 105°-225°-345°) and these four configurations were  
406 counterbalanced across subjects. Each subject viewed 1 of these 4 configurations for  
407 their entire scanning session.

#### 408 409 Visuospatial mapping task

410 Participants also completed 4-7 blocks of a visuospatial mapping task (one completed 4  
411 blocks, one completed 7 blocks, and the rest completed 6 blocks). The data from this  
412 task were then used as an independent data set to train an inverted encoding model  
413 (IEM) that was used to reconstruct spatial representations of the targets and distractors  
414 in the value-based learning task (see the analysis section below for more details).  
415 Participants were instructed to fixate centrally and to covertly attend to a checkerboard  
416 stimulus rendered at 100% Michelson contrast that pseudo-randomly appeared at  
417 different locations on the screen (3 sec duration; the same size, spatial frequency, and

418 flicker frequency as the stimulus in the value-based learning task). The participant's task  
419 was to detect a rare and brief dimming in contrast (19.57% target trials; 0.5 sec  
420 duration; occurring between 0.5-2 seconds after stimulus onset). On each trial, the  
421 checkerboard stimulus was presented at one of 37 locations on a triangular grid (1.50°  
422 visual angle between vertices), covering a visual space that overlapped with the  
423 stimulus locations in the value-based learning task (the first panel in Figure 3A). To  
424 smoothly cover the entire circular space, we randomly rotated the entire triangular grid  
425 around its center by 0°, 20°, or, 40° polar angle across different runs (blue, yellow, and  
426 red dots in the first panel in Figure 3A), so there were 111 different stimulus locations in  
427 total (see similar methods in Sprague et al., 2018). On each run, there were a total of 37  
428 non-targets (1 repeat per location) and 9 targets. Target locations were pseudo-  
429 randomly drawn from the 37 locations (never repeated within each block). The  
430 magnitude of the contrast change was adjusted across trials so that accuracy was at  
431 ~76% (mean hit = 77.95%, SD = 12.23%). Each stimulus presentation was followed by  
432 an ITI of 2-5 sec (uniformly distributed). We pseudo-randomly interleaved 10 null trials  
433 and included a blank period of 8.2 sec at the end of the block. Each block lasted 6.28  
434 minutes.

#### 435 *Behavioral analysis*

436 We first sorted trials from the main value-based decision-making task based on target  
437 selection (i.e., target type: selected and unselected), target value (low and high value),  
438 distractor value based on previous target rewards associated with the color of the  
439 distractor (low and high value), and selection history (i.e., whether the distractor was  
440 previously unselected or selected at least once in 3 preceding trials). We chose the 3-  
441 back analysis window because it yielded the most balanced number of trials between  
442 individual conditions. That said, an analysis using a window covering 1 or 2 previous  
443 trials yielded qualitatively consistent results. Note that because of the boundary  
444 between miniblocks (every 8 trials where value-color assignments were the same), we  
445 could only go back 1 and 2 trials for the 2<sup>nd</sup> and 3<sup>rd</sup> trials, respectively. We excluded  
446 data from the 1<sup>st</sup> trial of every 8 trials in each mini-block to reduce the spill-over effect  
447 from different sets of value-color assignments.

448  
449 Next, we examined subjects' choice preference. To do so, we labeled targets located  
450 clockwise (CW) and counter-clockwise (CCW) to the distractor CW and CCW targets  
451 and computed the probability that participants chose CW over CCW targets and plotted  
452 as a function of CW target value and CCW target value (Figure 2A). Next, we plotted  
453 the choices as a function of differential target value (CW – CCW) separately for different  
454 distractor values and fit individual subjects' data with the cumulative Gaussian function  
455 (Figure 2B). Specifically, we estimated the mean (or *mu*) and the standard deviation (or  
456 *sigma*) of the cumulative Gaussian function that best fit the choice preference data  
457 derived from different distractor values (see Table 1 for mean and SEM)[6]. To test  
458 distractor value modulations on these parameters, we computed the bootstrap  
459 distribution of the difference in these parameters between the high and low distractor  
460 value conditions (i.e., resampling subjects with replacement for 100,000 iterations) and  
461 calculated the percentage of values in this distribution that were larger or smaller than  
462

463 zero to yield a 2-tailed p-value. We performed this statistical analysis separately for  
464 previously selected and unselected distractors (see above).

465  
466 Finally, we examined the effect of distractor value on RTs. First, we computed the mean  
467 RTs across different distractor values for individual subjects. Then, we computed the  
468 bootstrap distribution of the RT difference between the high and low distractor value  
469 conditions (i.e., resampling subjects with replacement for 100,000 iterations) and  
470 calculated the percentage of values in this distribution that were larger or smaller than  
471 zero (a 2-tailed p-value). We performed this statistical analysis separately for previously  
472 selected and unselected distractors. We then compared whether the effect of distractor  
473 value was significantly larger in the selected condition than the unselected condition by  
474 a similar procedure that compared the two bootstrap distributions. Since we only  
475 observed significantly larger RT differences for previously selected targets, we knew the  
476 expected direction of the effect and therefore computed a 1-tailed p-value.

477  
478 *fMRI analysis*

#### 479 fMRI acquisition

480 All MRI data were acquired on a GE 3T MR750 scanner at the Keck Center for  
481 Functional Magnetic Resonance Imaging (CFMRI) at UCSD. Unless otherwise  
482 specified, all data were collected using a 32-channel head coil (Nova Medical). We  
483 acquired functional data using a multiband echo-planar imaging (EPI) protocol (Stanford  
484 Simultaneous Multi-Slice sequence). We acquired 9 axial slices per band at a multiband  
485 factor of 8, for 72 total slices (2x2x2 mm<sup>3</sup> voxel size; 800 ms TR; 35 ms TE; 35° flip  
486 angle; 104x104 cm matrix size). Prior to each functional scan, 16 TRs were acquired as  
487 reference images for image reconstruction. Raw k-space data were reconstructed into  
488 NIFTI format image files on internal servers using scripts provided by CFMRI. In each  
489 session, we also acquired forward and reverse phase encoding blips to estimate the  
490 susceptibility off-resonance field [51]. This was used to correct EPI signal distortion  
491 using FSL topup [52,53], the results of which was submitted to further preprocessing  
492 stages described below. In each session, we also acquired an accelerated anatomical  
493 using parallel imaging (GE ASSET on a FSPGR T1-weighted sequence; 1x1x1 mm<sup>3</sup>  
494 voxel size; 8136 ms TR; 3172 ms TE; 8° flip angle; 172 slices; 1 mm slice gap; 256x192  
495 cm matrix size). This same-session anatomical was coregistered to the functional data.  
496 It was also coregistered to a high-resolution anatomical from the retinotopic mapping  
497 session(s).

#### 498 499 Retinotopic mapping

500 To identify regions of interest (ROIs) in early visual cortex, we used a combination of  
501 retinotopic mapping methods. Individual participants completed meridian mapping (1-2  
502 ~5-min blocks), where they saw flickering checkerboards “bowties” along the horizontal  
503 and vertical meridians while fixating centrally. They also completed several scans of a  
504 polar angle mapping task (4-6 ~6-min blocks) where participants covertly attended to a  
505 rotating a checkerboard wedge and detected brief contrast changes (see details in  
506 Sprague and Serences, 2013; Vo et al., 2017). We identified retinotopically organized  
507 regions of visual areas V1, V2, and V3 using a combination of retinotopic maps of visual  
508 field meridians and polar angle preferences for each voxel in these visual areas and

509 concatenated left and right hemispheres as well as dorsal and ventral aspects of  
510 individual areas [54,55]. Visual area borders were drawn on an inflated cortical surface  
511 created from a high-resolution anatomical scan (FSPGR T1-weighted sequence; 1x1x1  
512 mm<sup>3</sup>; 8136 ms TR; 3172 ms TE; 8° flip angle; 172 slices; 1 mm slice gap; 256x192 cm  
513 matrix size) collected with an 8-channel head coil.

514

#### 515 fMRI data preprocessing

516 Analysis was performed in BrainVoyager 20.2 (Brain Innovation, Maastricht, The  
517 Netherlands) supplemented with custom analysis scripts written in MATLAB R2016a  
518 (The Mathworks Inc., Natick, Mass). Using the distortion-corrected images, we first  
519 performed slice-time correction, affine motion correction, and temporal high-pass  
520 filtering. Then the functional data were coregistered to the same-session anatomical  
521 and transformed to Talairach space. Each voxel's timecourse was z-scored within each  
522 run. We then built a design matrix with individual trial predictors convolved with a  
523 double-gamma HRF (peak = 5 s, undershoot peak = 15 s; response undershoot ratio =  
524 6; response dispersion = 1; undershoot dispersion = 1). We also included a baseline  
525 predictor. This allowed us to calculate single-trial beta weights using a general linear  
526 model (GLM). These beta weights served as input to the IEM described below.

527

#### 528 Inverted encoding model (IEM)

529 In order to create the reconstructions of target and distractor stimuli in the value-based  
530 learning task from individual ROIs, we employed an IEM for retinotopic space (see  
531 Figure 3; also see Brouwer & Heeger, 2009; Sprague et al., 2018; Sprague & Serences,  
532 2013; Vo, Sprague, & Serences, 2017). First, we computed a spatial sensitivity profile  
533 (i.e., an encoding model) for each voxel, parameterized as a weighted sum of  
534 experimenter-defined information channels (i.e. spatial filters in second panel of Figure  
535 3A) using an independent training data set acquired from the visuospatial mapping task  
536 (using only non-target trials). Then, we inverted the encoding models across all voxels  
537 to compute weights on the spatial information channels and used these weights to  
538 transform the fMRI data from the value-based learning task into an activation score.  
539 Specifically, the activation of each voxel is a weighted sum of 64 Gaussian-like spatial  
540 information channels arrayed in an 8 x 8 rectangular grid (see the second panel of  
541 Figure 3). The filter centers were equally spaced by 1.43° visual angle with full-width  
542 half-maximum of 2° visual angle). The Gaussian-like function of each filter is described  
543 by:

$$544 \quad f(r) = \left(0.5 + 0.5 \cos \frac{\pi r}{s}\right)^7 \text{ for } r < s; 0 \text{ otherwise, (Equation 1)}$$

545 where  $r$  is the distance from the filter center and  $s$  is a size parameter indicating the  
546 distance between filter centers at which the filter returns to 0. We set values greater  
547 than  $s$  to 0 ( $s = 5.0332$ ), resulting in a smooth filter at each position along the grid [30].

548

549 We then define the idealized response of the information channels for each given  
550 training trial. To do this, we multiplied a discretized version of the stimulus ( $n$  trials x  $p$   
551 pixels) by the 64 channels defined by Equation 1 ( $p$  pixels x  $k$  channels). We then  
552 normalized this result so that the maximum channel response is 1. This is  $C_1$  in the  
553 following equation:

$$554 \quad B_1 = C_1 W, \quad \text{(Equation 2)}$$

555 where  $B_1$  ( $n$  trials  $\times$   $m$  voxels) is the measured fMRI activity of each voxel during the  
556 visuospatial mapping task (i.e., beta weights, see fMRI Preprocessing section),  $C_1$  ( $n$   
557 trials  $\times$   $k$  channels) is the predicted response of each spatial filter (i.e., information  
558 channel normalized from 0 to 1), and  $W$  is a weight matrix ( $k$  channels  $\times$   $m$  voxels) that  
559 quantifies the contribution of each information channel to each voxel. Next, we used  
560 ordinary least-squares linear regression to solve for  $W$  with the following equation:

$$561 \quad \hat{W} = (C_1^T C_1)^{-1} C_1^T B_1 \quad (\text{Equation 3})$$

562 Here,  $\hat{W}$  represents all estimated voxel sensitivity profiles, which we computed  
563 separately for each ROI. Next, we used  $\hat{W}$  and the measured fMRI activity of each  
564 voxel (i.e., beta weights) during each trial of the value-based learning task to estimate  
565 the activation of each information channel using the following equation (see Figure 3B):

$$566 \quad \hat{C}_2 = B_2 \hat{W}^T \left( \hat{W} \hat{W}^T \right)^{-1} \quad (\text{Equation 4})$$

567 Here,  $\hat{C}_2$  represents the estimated activation of each information channel ( $n_2$  trials  $\times$   $k$   
568 channels), which gives rise to the observed activation pattern across all voxels within  
569 that ROI ( $B_2$ ,  $n_2$  trials  $\times$   $m$  voxels). To visualize and co-register trials across three  
570 stimulus locations, we computed spatial reconstructions by multiplying the spatial profile  
571 of each filter by the estimated activation level of the corresponding channel (i.e.  
572 computing a weighted sum; the last panel of Figure 3B). We rotated the center position  
573 of the spatial filters on each trial of individual participants such that the resulting 2D  
574 reconstructions of the target and distractor stimuli share common positions across trials  
575 and participants (CCW target, CW target, and distractor locations centered at  $30^\circ$ ,  $150^\circ$ ,  
576 and  $270^\circ$  polar angle, respectively;  $3.02^\circ$  visual angle from the center of the 2D  
577 reconstruction). Next, we sorted trials based on choice selection (selected and  
578 unselected) and target value (1 and 9 cents) and the reward history of the distractor  
579 (zero, low, and high) in the same way as we did for the behavioral analysis. Then we  
580 flipped all spatial reconstructions left to right on trials where the selected target location  
581 was on the left ( $150^\circ$ ) so that the unselected and selected targets always shared  
582 common locations on the left and right of the reconstruction, respectively ( $150^\circ$  and  
583  $30^\circ$ ). This step did not change the position of the distractor, so it stayed at  $270^\circ$  polar  
584 angle. Finally, we averaged the 2D reconstructions across trials with the same trial  
585 types for individual participants and then averaged those reconstructions across  
586 participants, resulting in the grand-average spatial reconstructions shown in Figure 4A.

### 587 fMRI statistical analysis

589 Following a previous approach [20,56], we extracted the reconstruction activation for  
590 each trial type in individual participants by averaging the data within the circular space  
591 spanning the entire area of individual stimuli. This was used as our “reconstruction  
592 activation” measure. Like the behavioral analyses, all statistical analyses were  
593 conducted by resampling relevant values from each subject with replacement for  
594 100,000 iterations and comparing these values across resampling iterations

595  
596 First, we examined the distractor value modulation on the distractor reconstruction  
597 activation for data averaged across V1-V3. To do so, we computed the bootstrap

598 distribution of the difference of the distractor reconstruction activation between the high  
599 and low distractor value conditions and calculated the percentage of values in this  
600 distribution that were larger or smaller than zero (2-tailed). We performed this statistical  
601 analysis separately for trials where the current distractor was previously selected and  
602 unselected in preceding trials to examine if the distractor value modulation depended on  
603 selection history. We then compared whether the effect of distractor value was  
604 significantly larger in the selected condition than the unselected condition by a similar  
605 procedure that compared the two bootstrap distributions (1-tailed to the known direction  
606 of the difference). We repeated the same statistical procedures for individual visual  
607 areas, and corrected for multiple comparisons using the Holm-Bonferroni method[57].  
608

609 Next, we tested the target selection modulation on the target reconstruction activation  
610 for data averaged across V1-V3. To do so, we computed the bootstrap distribution of  
611 the difference between the selected and unselected target reconstruction activation and  
612 calculated the percentage of values in this distribution that were larger or smaller than  
613 zero (2-tailed). We first performed this on the data collapsed across all distractor types.  
614 Then we assessed the target selection modulations separately for individual distractor  
615 values and corrected for multiple comparisons using the Holm-Bonferroni method.  
616 Then, we tested for the distractor value modulation on the target selection modulation  
617 by computing the bootstrap distribution of the difference of the target selection  
618 modulations between the high and low distractor value conditions and computing the  
619 percentage of values in this distribution that were larger or smaller than zero (2-tailed).  
620 This was done separately for trials where the current distractor was previously  
621 unselected and selected in preceding trials. We repeated the same statistical  
622 procedures for individual visual areas, and corrected for multiple comparisons using the  
623 Holm-Bonferroni method.  
624

625 Finally, we tested whether target selection modulations depended on the relative value  
626 difference between selected and unselected targets, as suggested by previous  
627 studies[23–25]. For each target value condition (same vs different target values) and  
628 each visual area, we computed the bootstrap distribution of the difference between the  
629 selected and unselected target reconstruction activation and calculated the percentage  
630 of values in this distribution that were larger or smaller than zero (2-tailed). Here, we  
631 also corrected for multiple comparisons across different target value conditions and  
632 different visual areas using the Holm-Bonferroni method (6 comparisons). Since we  
633 found more robust target selection modulations in higher visual areas in trials where the  
634 selected and unselected targets had different values, we further tested if the target  
635 selection modulation in V3 was higher than that in V1, if the target modulation in V2 was  
636 higher than that in V1, and if the target modulation in V2 was higher than that V1. To do  
637 so, we compared the target selection modulation distributions across these visual areas  
638 (1 tailed, due to the known direction of the difference), and corrected for multiple  
639 comparisons using the Holm-Bonferroni method.  
640

641  
642  
643

644

## 645 **Conflicts of Interest**

646 The authors declare no competing interests.

647

## 648 **Acknowledgements**

649 Funding provided by NEI R01-EY025872 to J.T.S., a James S. McDonnell Foundation  
650 Scholar Award to J.T.S., the Howard Hughes Medical Institute International student  
651 fellowship to S.I., a Royal Thai Scholarship from the Ministry of Science and Technology  
652 Thailand to S.I., NSF GRFP to V.A.V., and NEI F32-EY028438 to T.C.S. We thank  
653 Margaret Henderson for help with data processing, Chaipat Chunharas for assistance  
654 with data collection, and Edward Vul for useful discussions.

655

656

## 657 **References**

- 658 1. Yantis S, Jonides J. Abrupt visual onsets and selective attention: evidence from  
659 visual search. *J Exp Psychol Hum Percept Perform.* 1984;10: 601–621.  
660 doi:10.1037/0096-1523.10.5.601
- 661 2. Theeuwes J, Krueger L, Chun M, Pashler H. Perceptual selectivity for color and  
662 form. *Percept Psychophys.* 1992;51: 599–606.
- 663 3. Egeth HE, Yantis S. Visual attention: control, representation, and time course.  
664 *Annu Rev Psychol.* 1997;48: 269–297. doi:10.1146/annurev.psych.48.1.269
- 665 4. Wolfe JM. Visual Search. *Attention, Perception, Psychophys.* 1998;20: 13–73.  
666 doi:10.1016/j.tics.2010.12.001
- 667 5. Anderson BA, Laurent PA, Yantis S. Value-driven attentional capture. *Proc Natl*  
668 *Acad Sci U S A.* 2011;108: 10367–71. doi:10.1073/pnas.1104047108
- 669 6. Itthipuripat S, Cha K, Rangsiapat N, Serences JT. Value-based attentional capture  
670 influences context-dependent decision-making. *J Neurophysiol.* 2015;114: 560–  
671 569. doi:10.1152/jn.00343.2015
- 672 7. Hickey C, Chelazzi L, Theeuwes J. Reward changes salience in human vision via  
673 the anterior cingulate. *J Neurosci. Society for Neuroscience;* 2010;30: 11096–103.  
674 doi:10.1523/JNEUROSCI.1026-10.2010
- 675 8. Anderson BA. Going for it: The economics of automaticity in perception and  
676 action. *Curr Dir Psychol Sci.* 2017;26: 140–145. doi:10.1177/0963721416686181
- 677 9. Awh E, Belopolsky A V., Theeuwes J. Top-down versus bottom-up attentional  
678 control: A failed theoretical dichotomy. *Trends Cogn Sci. Elsevier Ltd;* 2012;16:  
679 437–443. doi:10.1016/j.tics.2012.06.010
- 680 10. Libera C Della, Chelazzi L. Learning to attend and to ignore is a matter of gains  
681 and losses. *Psychol Sci.* 2009;20: 778–784. doi:10.1111/j.1467-  
682 9280.2009.02360.x
- 683 11. Gluth S, Spektor MS, Rieskamp J. Value-based attentional capture affects multi-  
684 alternative decision making. *Elife.* 2018;7: 1–36. doi:10.7554/eLife.39659
- 685 12. Moher J, Anderson BA, Song JH. Dissociable Effects of Salience on Attention and  
686 Goal-Directed Action. *Curr Biol. Elsevier Ltd;* 2015;25: 2040–2046.  
687 doi:10.1016/j.cub.2015.06.029
- 688 13. Hickey C, van Zoest W. Reward-associated stimuli capture the eyes in spite of  
689 strategic attentional set. *Vision Res. Elsevier Ltd;* 2013;92: 67–74.

- 690 doi:10.1016/j.visres.2013.09.008
- 691 14. Maclean MH, Diaz GK, Giesbrecht B. Irrelevant learned reward associations  
692 disrupt voluntary spatial attention. *Atten Percept Psychophys. Attention,*  
693 *Perception, & Psychophysics*; 2016;78: 2241–2252. doi:10.3758/s13414-016-  
694 1103-x
- 695 15. Maclean MH, Giesbrecht B. Neural evidence reveals the rapid effects of reward  
696 history on selective attention. *Brain Res. Elsevier*; 2015;1606: 86–94.  
697 doi:10.1016/j.brainres.2015.02.016
- 698 16. MacLean MH, Giesbrecht B. Irrelevant reward and selection histories have  
699 different influences on task-relevant attentional selection. *Attention, Perception,*  
700 *Psychophys.* 2015;77: 1515–1528. doi:10.3758/s13414-015-0851-3
- 701 17. Krebs RM, Boehler CN, Egner T, Woldorff MG. The neural underpinnings of how  
702 reward associations can both guide and misguide attention. *J Neurosci.* 2011;31:  
703 9752–9759. doi:10.1523/JNEUROSCI.0732-11.2011
- 704 18. Sali AW, Anderson BA, Yantis S, Mostofsky SH, Rosch KS. Reduced value-driven  
705 attentional capture among children with ADHD compared to typically developing  
706 controls. *J Abnorm Child Psychol. Journal of Abnormal Child Psychology*;  
707 2018;46: 1187–1200. doi:10.1007/s10802-017-0345-y
- 708 19. Anderson BA, Faulkner ML, Rilee JJ, Yantis S, Ph D, Marvel CL, et al. Attentional  
709 bias for non-drug reward is magnified in addiction. 2014;21: 499–506.  
710 doi:10.1037/a0034575.Attentional
- 711 20. Sprague TC, Itthipuripat S, Vo VA, Serences JT. Dissociable signatures of visual  
712 salience and behavioral relevance across attentional priority maps in human  
713 cortex. *J Neurophysiol.* 2018;119: 2153–2165. doi:doi:10.1152/jn.00059
- 714 21. Zhang X, Zhaoping L, Zhou T, Fang F. Neural activities in V1 create a bottom-up  
715 saliency map. *Neuron. Elsevier Inc.*; 2012;73: 183–92.  
716 doi:10.1016/j.neuron.2011.10.035
- 717 22. Chen C, Zhang X, Wang Y, Zhou T, Fang F. Neural activities in V1 create the  
718 bottom-up saliency map of natural scenes. *Exp Brain Res. Springer Berlin*  
719 *Heidelberg*; 2016;234: 1769–1780. doi:10.1007/s00221-016-4583-y
- 720 23. Serences JT. Value-Based Modulations in Human Visual Cortex. *Neuron. Elsevier*  
721 *Ltd*; 2008;60: 1169–1181. doi:10.1016/j.neuron.2008.10.051
- 722 24. Serences JT, Saproo S. Population Response Profiles in Early Visual Cortex Are  
723 Biased in Favor of More Valuable Stimuli. *J Neurophysiol.* 2010;104: 76–87.  
724 doi:10.1152/jn.01090.2009
- 725 25. Stănişor L, van der Togt C, Pennartz CMA, Roelfsema PR. A unified selection  
726 signal for attention and reward in primary visual cortex. *Proc Natl Acad Sci U S A.*  
727 *National Academy of Sciences*; 2013;110: 9136–41.  
728 doi:10.1073/pnas.1300117110
- 729 26. Baruni JK, Lau B, Salzman CD. Reward expectation differentially modulates  
730 attentional behavior and activity in visual area V4. *Nat Neurosci.* 2015;18: 1656–  
731 1663. doi:10.1038/nn.4141
- 732 27. Louie K, Khaw MW, Glimcher PW. Normalization is a general neural mechanism  
733 for context-dependent decision making. *Proc Natl Acad Sci.* 2013;110: 6139–  
734 6144. doi:10.1073/pnas.1217854110
- 735 28. Chau BKH, Kolling N, Hunt LT, Walton ME, Rushworth MFS. A neural mechanism



- 736 underlying failure of optimal choice with multiple alternatives. *Nat Neurosci.*  
737 Nature Publishing Group; 2014;17: 463–470. doi:10.1038/nn.3649
- 738 29. Brouwer GJ, Heeger DJ. Decoding and reconstructing color from responses in  
739 human visual cortex. *J Neurosci.* 2009;29: 13992–14003.  
740 doi:10.1523/JNEUROSCI.3577-09.2009
- 741 30. Sprague TC, Serences JT. Attention modulates spatial priority maps in the human  
742 occipital, parietal and frontal cortices. *Nat Neurosci.* 2013;16: 1879–87.  
743 doi:10.1038/nn.3574
- 744 31. Vo VA, Sprague TC, Serences JT. Spatial Tuning Shifts Increase the  
745 Discriminability and Fidelity of Population Codes in Visual Cortex. *J Neurosci.*  
746 2017;37: 3386–3401. doi:10.1523/JNEUROSCI.3484-16.2017
- 747 32. Anderson BA, Laurent PA, Yantis S. Value-driven attentional priority signals in  
748 human basal ganglia and visual cortex. *Brain Res. Elsevier;* 2014;1587: 88–96.  
749 doi:10.1016/J.BRAINRES.2014.08.062
- 750 33. Hickey C, Peelen M V. Neural mechanisms of incentive salience in naturalistic  
751 human vision. *Neuron. Cell Press;* 2015;85: 512–518.  
752 doi:10.1016/J.NEURON.2014.12.049
- 753 34. Hickey C, Peelen M V. Reward selectively modulates the lingering neural  
754 representation of recently attended objects in natural scenes. *J Neurosci. Society*  
755 *for Neuroscience;* 2017;37: 7297–7304. doi:10.1523/JNEUROSCI.0684-17.2017
- 756 35. Barbaro L, Peelen M V., Hickey C. Valence, not utility, underlies reward-driven  
757 prioritization in human vision. *J Neurosci.* 2017;37: 1128–17.  
758 doi:10.1523/JNEUROSCI.1128-17.2017
- 759 36. Gong M, Jia K, Li S. Perceptual Competition Promotes Suppression of Reward  
760 Salience in Behavioral Selection and Neural Representation. *J Neurosci.* 2017;37:  
761 6242–6252. doi:10.1523/JNEUROSCI.0217-17.2017
- 762 37. Zeki SM. Functional organization of a visual area in the posterior bank of the  
763 superior temporal sulcus of the rhesus monkey. *J Physiol.* 1974;236: 549–573.  
764 doi:10.1113/jphysiol.1974.sp010452
- 765 38. Conway BR, Moeller S, Tsao DY. Specialized Color Modules in Macaque  
766 Extrastriate Cortex. *Neuron.* 2007;56: 560–573. doi:10.1016/j.neuron.2007.10.008
- 767 39. Zeki S, Bartels A. The architecture of the colour centre in the human visual brain:  
768 new results and a review \*. *Eur J Neurosci.* 2000;12: 172–193.  
769 doi:10.1046/j.1460-9568.2000.00905.x
- 770 40. Brewer AA, Liu J, Wade AR, Wandell BA. Visual field maps and stimulus  
771 selectivity in human ventral occipital cortex. *Nat Neurosci.* 2005;8: 1102–1109.  
772 doi:10.1038/nn1507
- 773 41. Brouwer GJ, Heeger DJ. Categorical Clustering of the Neural Representation of  
774 Color. *J Neurosci.* 2013;33: 15454–15465. doi:10.1523/JNEUROSCI.2472-  
775 13.2013
- 776 42. Hadjikhani N, Liu AK, Dale AM, Cavanagh P, Tootell RBH. Retinotopy and color  
777 sensitivity in human visual cortical area V8. *Nat Neurosci.* 1998;1: 235–241.  
778 doi:10.1038/681
- 779 43. Bressler DW, Silver MA. Spatial attention improves reliability of fMRI retinotopic  
780 mapping signals in occipital and parietal cortex. *Neuroimage. Elsevier Inc.;*  
781 2010;53: 526–33. doi:10.1016/j.neuroimage.2010.06.063

- 782 44. Bressler DW, Fortenbaugh FC, Robertson LC, Silver MA. Visual spatial attention  
783 enhances the amplitude of positive and negative fMRI responses to visual  
784 stimulation in an eccentricity-dependent manner. *Vision Res.* Elsevier Ltd;  
785 2013;85: 104–112. doi:10.1016/j.visres.2013.03.009
- 786 45. Serences JT, Yantis S. Selective visual attention and perceptual coherence.  
787 *Trends Cogn Sci.* 2006;10. doi:10.1016/j.tics.2005.11.008
- 788 46. Sprague TC, Saproo S, Serences JT. Visual attention mitigates information loss in  
789 small- and large-scale neural codes. *Trends Cogn Sci.* Elsevier Ltd; 2015; 1–12.  
790 doi:10.1016/j.tics.2015.02.005
- 791 47. Parkes LM, Marsman JBC, Oxley DC, Goulermas JY, Wuerger SM. Multivoxel  
792 fMRI analysis of color tuning in human primary visual cortex. *J Vis.* 2009;9: 1–1.  
793 doi:10.1167/9.1.1
- 794 48. Brouwer G, Heeger D. Decoding and Reconstructing Color from Responses in  
795 Human Visual Cortex. *J Neurosci.* 2009;29: 13992–14003.
- 796 49. Brainard DH. The Psychophysics Toolbox. *Spat Vis.* 1997;10: 433–436.
- 797 50. Watson AB, Pelli DG. QUEST: a Bayesian adaptive psychometric method.  
798 *Percept Psychophys.* 1983;33: 113–120. doi:10.3758/BF03202828
- 799 51. Andersson JLR, Skare S, Ashburner J. How to correct susceptibility distortions in  
800 spin-echo echo-planar images: application to diffusion tensor imaging.  
801 *Neuroimage.* Academic Press; 2003;20: 870–888. doi:10.1016/S1053-  
802 8119(03)00336-7
- 803 52. Smith SM, Jenkinson M, Woolrich MW, Beckmann CF, Behrens TEJ, Johansen-  
804 Berg H, et al. Advances in functional and structural MR image analysis and  
805 implementation as FSL. *Neuroimage.* Academic Press; 2004;23: S208–S219.  
806 doi:10.1016/J.NEUROIMAGE.2004.07.051
- 807 53. Jenkinson M, Beckmann CF, Behrens TEJ, Woolrich MW, Smith SM. FSL.  
808 *Neuroimage.* Academic Press; 2012;62: 782–790.  
809 doi:10.1016/J.NEUROIMAGE.2011.09.015
- 810 54. Engel SA, Rumelhart DE, Wandell BA. fMRI of human visual cortex. *Nature.*  
811 1994;369: 525.
- 812 55. Swisher JD, Halko MA, Merabet LB, McMains SA, Somers DC. Visual  
813 Topography of Human Intraparietal Sulcus. *J Neurosci.* 2007;27: 5326–5337.  
814 doi:10.1523/JNEUROSCI.0991-07.2007
- 815 56. Sprague TC, Ester EF, Serences JT. Restoring Latent Visual Working Memory  
816 Representations in Human Cortex Article. *Neuron.* Elsevier Inc.; 2016;91: 694–  
817 707. doi:10.1016/j.neuron.2016.07.006
- 818 57. Dunn OJ. Multiple Comparisons Among Means. *J Am Stat Assoc.* 1961;56: 52–  
819 64.
- 820  
821  
822  
823  
824  
825  
826  
827

| Behavioral measurements | Distractor types: Distractor value & Selection history (mean $\pm$ SEM) |                   |                  |                  |
|-------------------------|-------------------------------------------------------------------------|-------------------|------------------|------------------|
|                         | Low & Unselected                                                        | High & Unselected | Low & Selected   | High & Selected  |
| <i>Sigma</i>            | 23.99 $\pm$ 8.01                                                        | 29.87 $\pm$ 9.48  | 32.66 $\pm$ 7.09 | 33.56 $\pm$ 7.81 |
| <i>Mu</i>               | 0.85 $\pm$ 2.41                                                         | 0.17 $\pm$ 2.80   | 1.31 $\pm$ 1.58  | -1.46 $\pm$ 1.13 |
| RTs (ms)                | 600 $\pm$ 20                                                            | 612 $\pm$ 15      | 592 $\pm$ 18     | 643 $\pm$ 19     |

828 **Table 1.** Cumulative Gaussian parameters describing choice preference data and  
829 response times (RTs) for different distractor types shown in Figure 2.

830

831

832

833

834

835

836

837

838

839

840

841

842

843

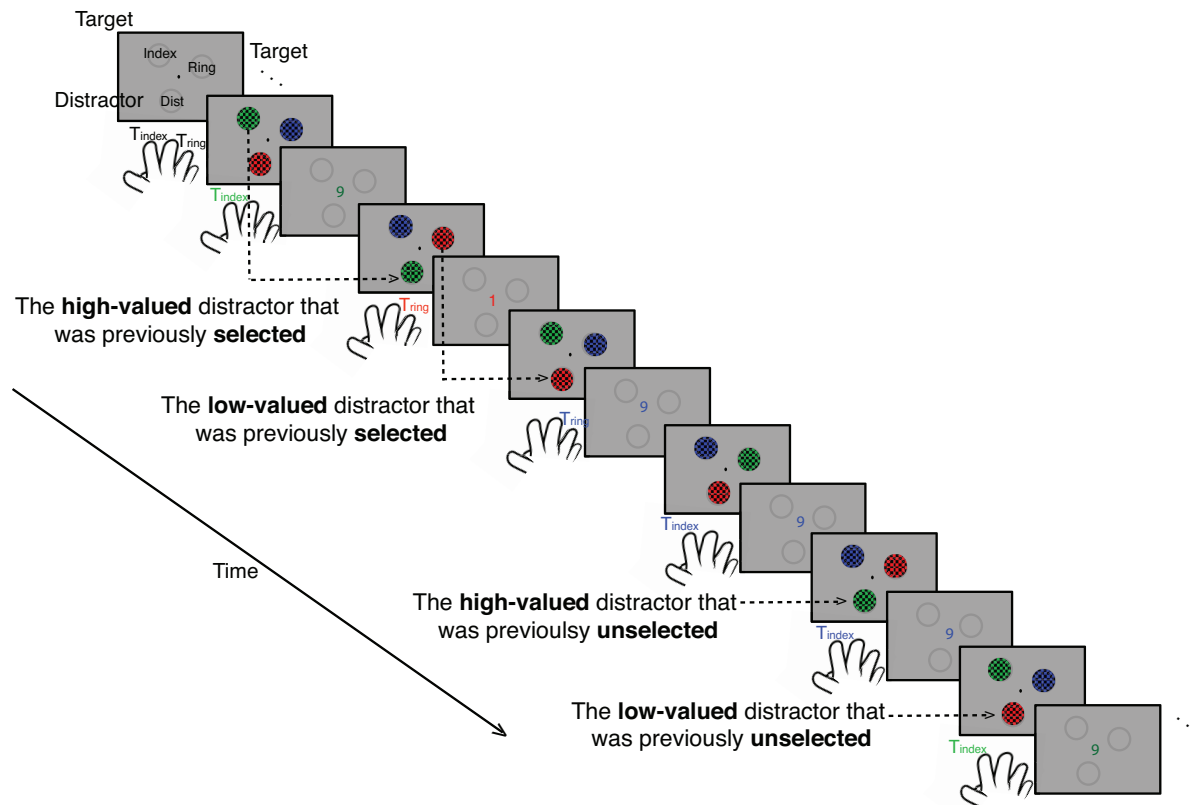

844  
845  
846  
847  
848  
849  
850  
851

**Figure 1.** Value-based decision-making task. Participants selected one of the two target stimuli to learn values associated with their colors, while ignoring a task-irrelevant distractor that could never be selected and was thus unactionable. Across trials, the colors of the targets and the distractor changed randomly so that the distractor color on a given trial could match the color of a previously selected target that yielded either a low or a high monetary reward (i.e., low- or high-valued distractor).

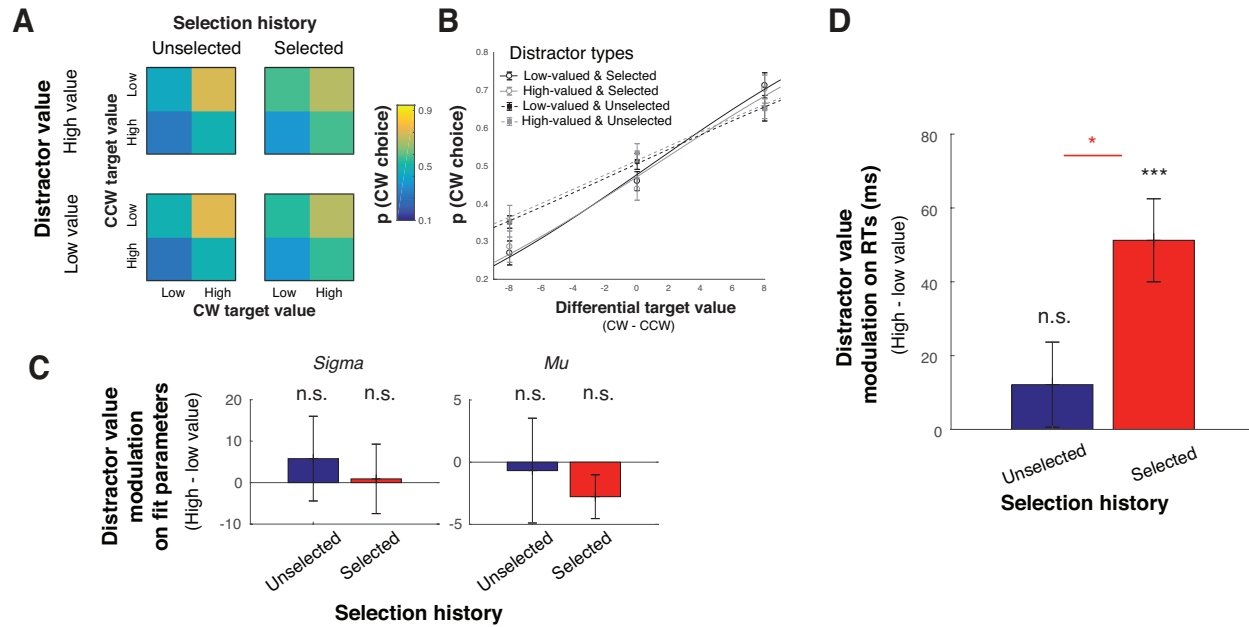

852  
853  
854  
855  
856  
857  
858  
859  
860  
861  
862  
863  
864  
865  
866  
867  
868

**Figure 2.** High-valued distractors increased response times. (A) Choice preference for high-valued targets for different distractor types. CW and CCW targets are targets located clockwise and counter-clockwise to the distractor location, respectively. (B) The same choice preference data, overlaid with the best fit cumulative Gaussian function (see Table 1). (C) Distractor value modulation (high – low distractor value) of regression parameters that explain choice preference functions in (B) (also see Table 1). Overall, we observed no distractor value modulation on choice preference functions: none of the regression parameters changed with distractor value in trials where the current distractor was previously selected or unselected. (D) Unlike choice preference data, we observed a robust distractor value modulation on RTs. The RT effect was significant only for trials where the distractor was previously selected. Black \*\*\* shows a significant distractor value modulation compared to zero with  $p < 0.001$  (2-tailed; resampling test). Red \* shows a significant difference between trials where the current distractors were previously selected and unselected with  $p < 0.05$  (1-tailed). All error bars show  $\pm 1$  standard error of the mean (SEM).

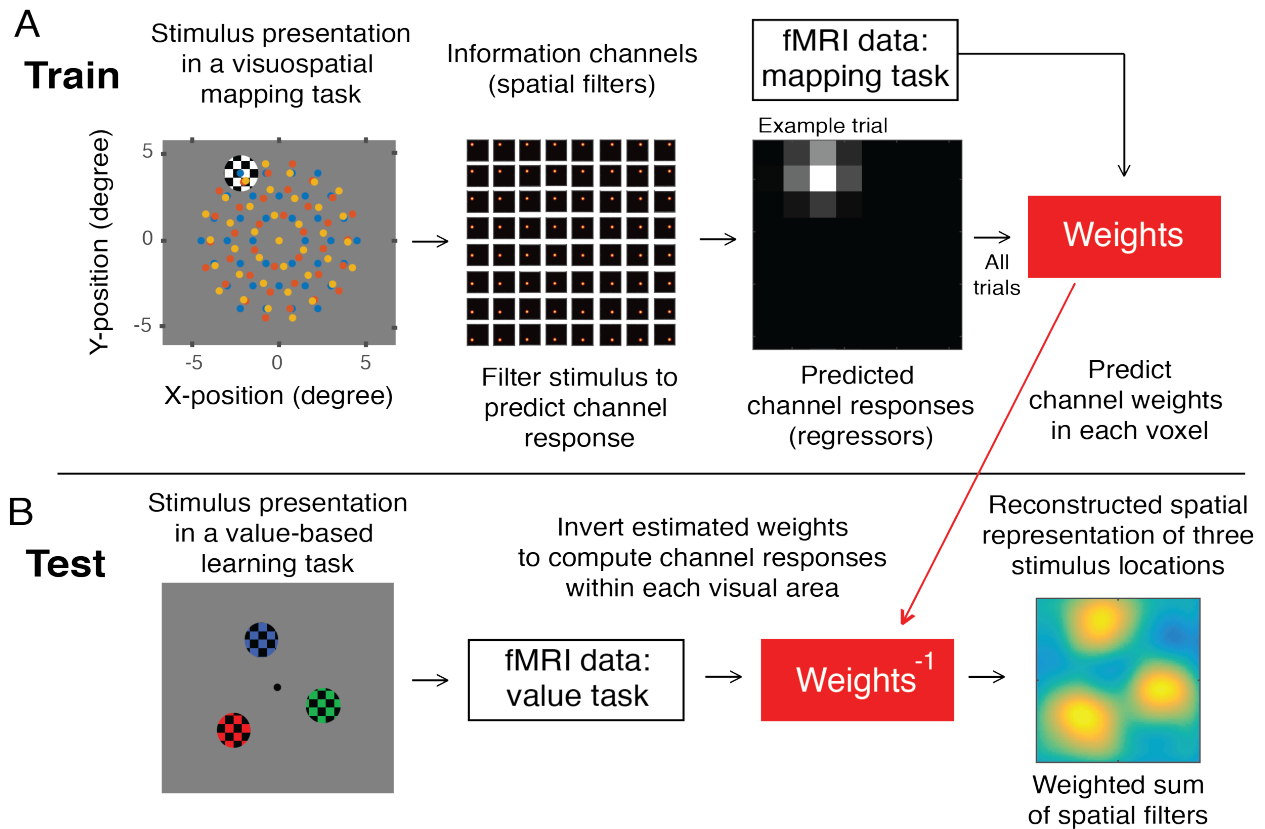

869  
870

871 **Figure 3.** Quantifying stimulus representations with an inverted encoding model (IEM).  
872 (A) The IEM was trained using fMRI data from the visuospatial mapping task, where  
873 flickering-checkerboard mapping stimuli were randomly presented at each of 111  
874 locations (center locations shown in blue, red, and yellow dots in the first panels; these  
875 dots were not physically presented to participants). We filtered individual stimulus  
876 locations using 64 Gaussian-like spatial filters to predict channels responses for each  
877 trial. We then use the predicted channel responses and fMRI data of all trials to predict  
878 channel weights for each voxel within each visual area. (B) The IEM was tested using  
879 fMRI data from the value-based learning task (an independent dataset). We inverted  
880 the estimated channel weights to compute channel responses within each visual area,  
881 resulting in a spatial reconstruction centered at three stimulus locations in the value-  
882 based learning task.

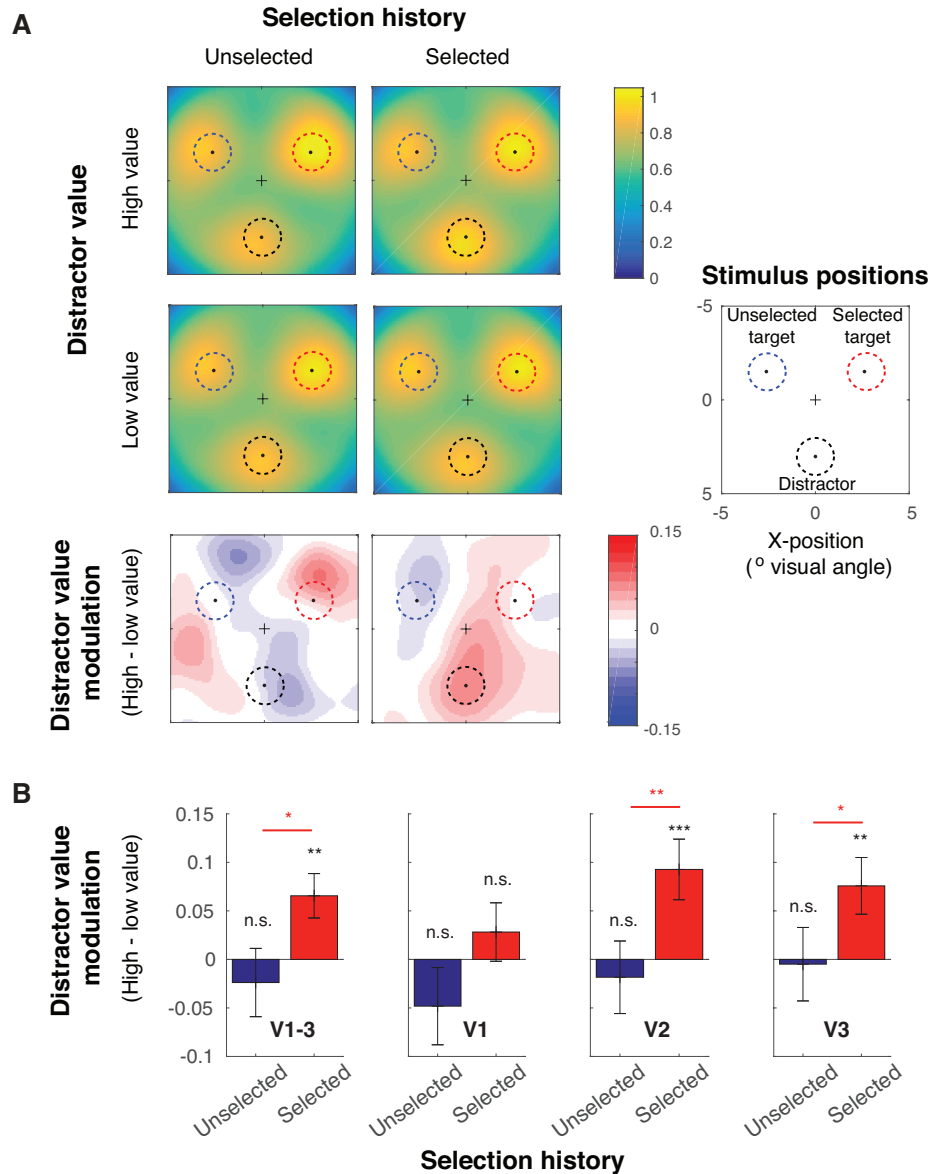

883  
884  
885  
886  
887  
888  
889  
890  
891  
892  
893  
894  
895  
896  
897

**Figure 4.** Distractor value boosted the activation of distractor representations in early visual cortex. (A) Averaged spatial reconstructions of the selected target, unselected target, and distractor based on fMRI activation patterns in early visual areas (collapsed across V1-V3). The data were sorted based on the distractor value (high and low distractor value) and the selection history (previously selected and unselected; also see Online Methods). Before averaging, reconstructions were rotated so that the positions of each respective stimulus type were in register across subjects. In each color plot, a black dot marks the location of the central fixation, and three surrounding dots at 30°, 150°, 270° polar angle indicate the centers of the selected target, unselected target, and distractor locations, respectively. The bottom panels show difference plots between high and low distractor value conditions. (B) The distractor value modulation (high – low distractor value) from the reconstruction activation (averaged across black dashed circles in A). Overall, we found significant distractor value modulations in extrastriate visual areas V2 and V3, only in trials where the current distractor was previously

898 selected. Black \*\* and \*\*\* show significant distractor value modulations compared to  
899 zero with  $p < 0.01$  and  $p < 0.001$  (2-tailed). Red \* and \*\* show a significant difference  
900 between trials where the current distractors were previously selected and unselected  
901 with  $p < 0.05$  and  $p < 0.01$  (1-tailed). The stats computed for different visual areas were  
902 corrected using the Holm-Bonferroni method. All error bars show  $\pm 1$  standard error of  
903 the mean (SEM). Blue, red, and black dashed circles in A represent the spatial extents  
904 of unselected targets, selected targets, and distractors, respectively.

905  
906  
907  
908  
909  
910  
911  
912  
913  
914  
915  
916  
917  
918  
919  
920  
921  
922  
923  
924  
925  
926  
927  
928  
929  
930  
931



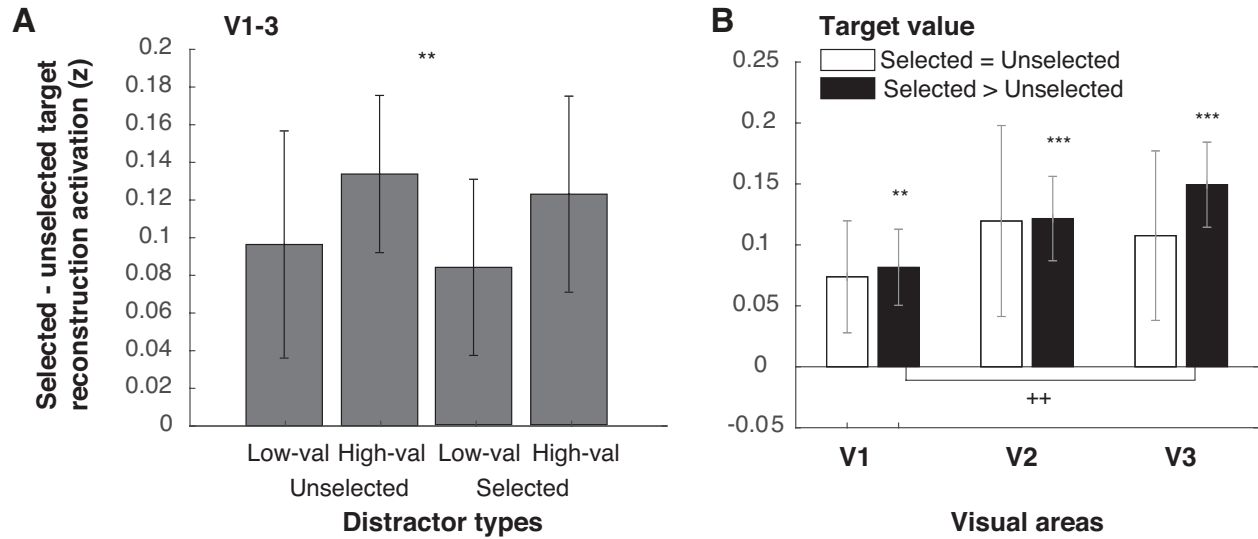

932  
933

934 **Figure 5.** Target selection modulations in early visual areas. (A) The difference between  
935 the selected and unselected target reconstruction activation for different target types.  
936 The activation values were obtained from averaging the reconstruction activation over  
937 circular spaces spanning the spatial extents of target stimuli (red and blue dashed  
938 circles in Figure 4A). The data in (A) were collapsed across visual areas. (B) The same  
939 data as (A) but plotted separately for different target value conditions and for different  
940 visual areas. \*\* and \*\*\* indicate significant target selection modulations compared to  
941 zero with  $p$ 's  $< 0.01$  and  $< 0.001$ , respectively (2-tailed). ++ indicate a significant  
942 difference across visual areas V1 and V3. Stats in (B) were corrected with the Holm-  
943 Bonferroni method. All sub-figures are plotted with  $\pm 1$  SEM.  
944
